# Supplementary material
Source: PubMed Central journal article supplement (PMC8057115)
Supplement: NIHMS1681818-supplement-Supplemental_figures_table.pdf [file NIHMS1681818-supplement-Supplemental_figures_table.pdf]

## Supplementary Figure Legends

**Supplementary Figure 1. High frequencies of circulating B cells in patients with CLL.** Frequencies of T and B cells in patients with CLL and HDs (A) (patients with CLL n=12, HDs n=9). Representative flow cytometric analysis of CD5+ B cells in patients with CLL, identified in the lymphocyte and blasts cells gates (B).

**Supplementary Figure 2. *In vitro* expanded CD19 CAR T cells from patient with CLL kill specifically CD19+ cells.** (A) Frequencies of CD3+ T cells and CD19+ B cells three days after CD19 CAR retroviral transduction of a patient with CLL cells (top panel), and in untransduced control cells (bottom panel). (B) CD19 CAR T cells produced from a patient with CLL were incubated for 24hrs with either CD19+ K562 cells (top panel), or NGFR+ K562 cells (bottom panel) before analysis.

**Supplementary Figure 3. CD4/CD8 ratio of *in vitro* expanded CD19 CAR+ and CAR- T cells.** CD4/CD8 ratio in CD19 CAR+ and CD19 CAR- T cells in patients with CLL (n=9) and healthy donors (n=9). Wilcoxon test.

**Supplementary Figure 4. *In vitro* expanded CD19 CAR- T cells phenotype.** CD45RA and CCR7 expression in (A) patients with CLL (n=9), and (B) in HDs (n=9). Squares represent CD8+ CD19 CAR- T cells, and triangles CD4+ CD19 CAR- T cells. Wilcoxon test, \* P < 0.05. \*\* P < 0.004.

**Supplementary Figure 5. Cytokine production in response to NGFR+ K562 cells, and after PMA/Ionomycin stimulation of *in vitro* expanded CD19 CAR transduced T cells.** Frequencies within (A) CD8+ and (B) CD4+ T cells after stimulation with NGFR+ K562 cells in patients with CLL (n=9) and HDs (n=7), and after PMA/Ionomycin stimulation within (C) CD8+ T cells and (D) CD4+ T cells in

patients with CLL (n=7) and HDs (n=5). Black circles represent patients with CLL, and open circles HDs. Mann-Whitney test, \* P < 0.04. \*\* P < 0.006.

**Supplementary Figure 6. CD19+ K562 cells express high levels of cell surface CD19.** Overlay of CD19 cell surface expression from CD19+ K562 cells, CLL cells and HD (EBV-transformed) B cells using a FITC-conjugated CD19 antibody (A), from CLL cells (n=4) and HD (EBV-transformed) B cells (n=3) using an APC-conjugated CD19 antibody (B).

**Supplementary Figure 7. CD19+ K562 and autologous B cells induce a different effector profile on *in vitro* expanded and stimulated CD19 CAR T cells.** The different combinations of CD107a expression and IFN- $\gamma$ /IL-2/TNF production median values within activated (displaying at least one of the function measured) CD8+ and CD4+ CD19 CAR T cells in response to either CD19+ K562 cells or autologous B cells (A and B) in patients with CLL (n=9), and (C and D) in HDs (n=7-8). Mann-Whitney test, \* P < 0.05. \*\* P < 0.008.

# Supplementary Figure 1.

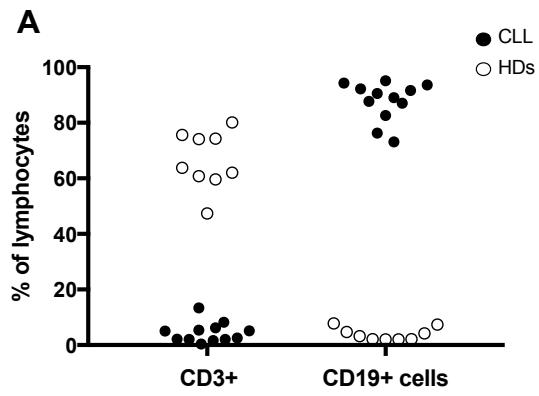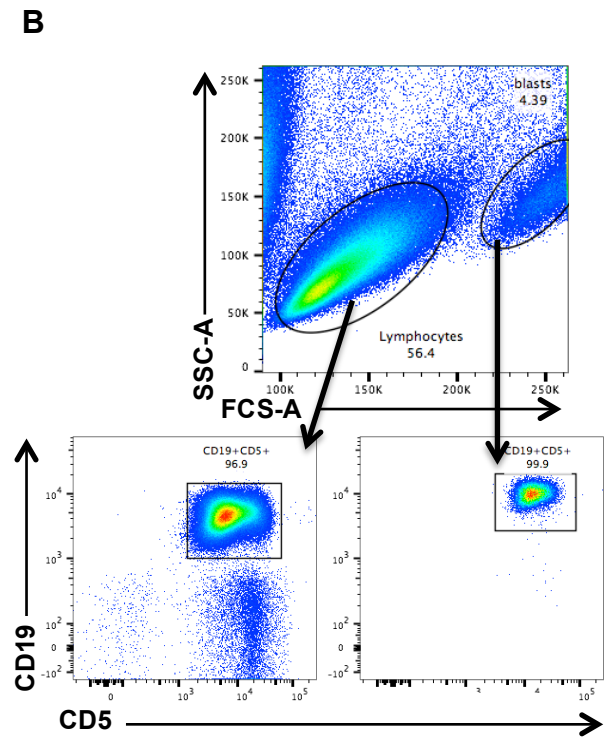

## Supplementary Figure 2.

**A**

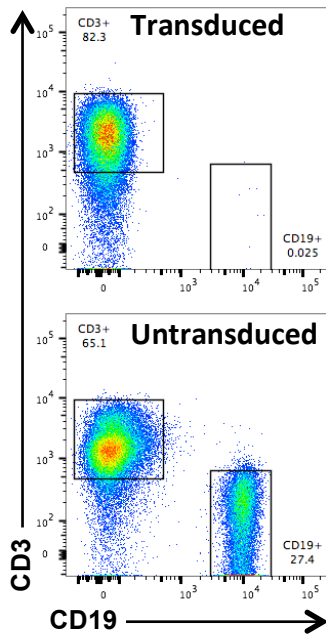

**B**

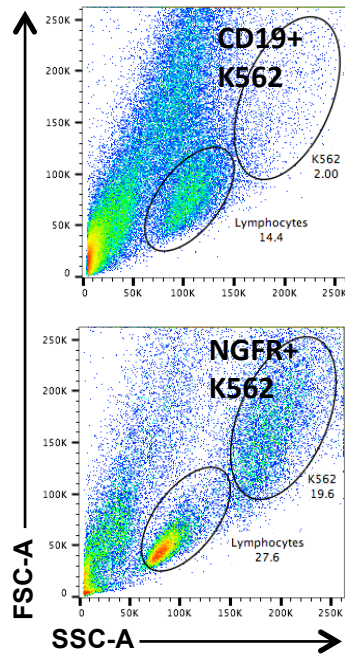

Supplementary Figure 3.

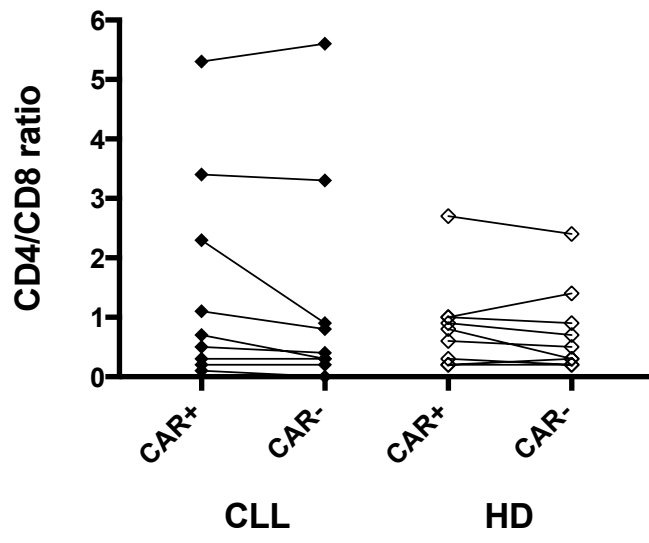

Supplementary Figure 4.

**A**

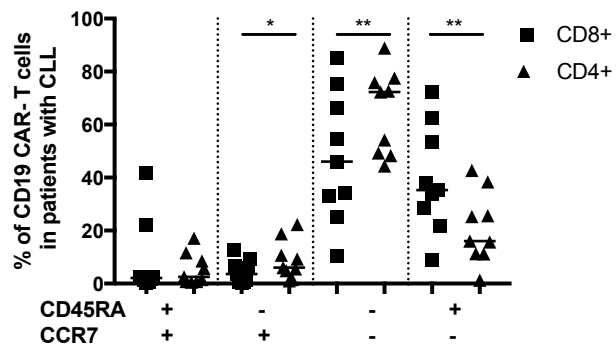

**B**

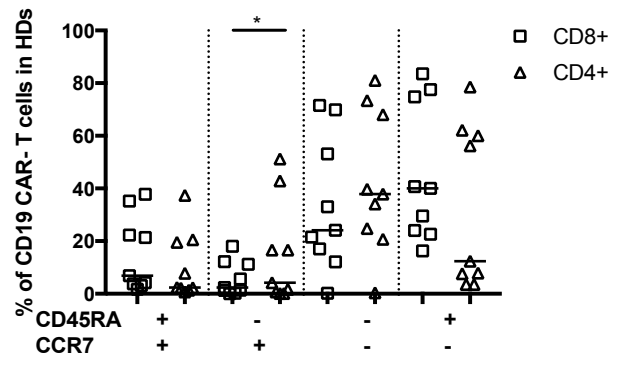

Supplementary Figure 5.

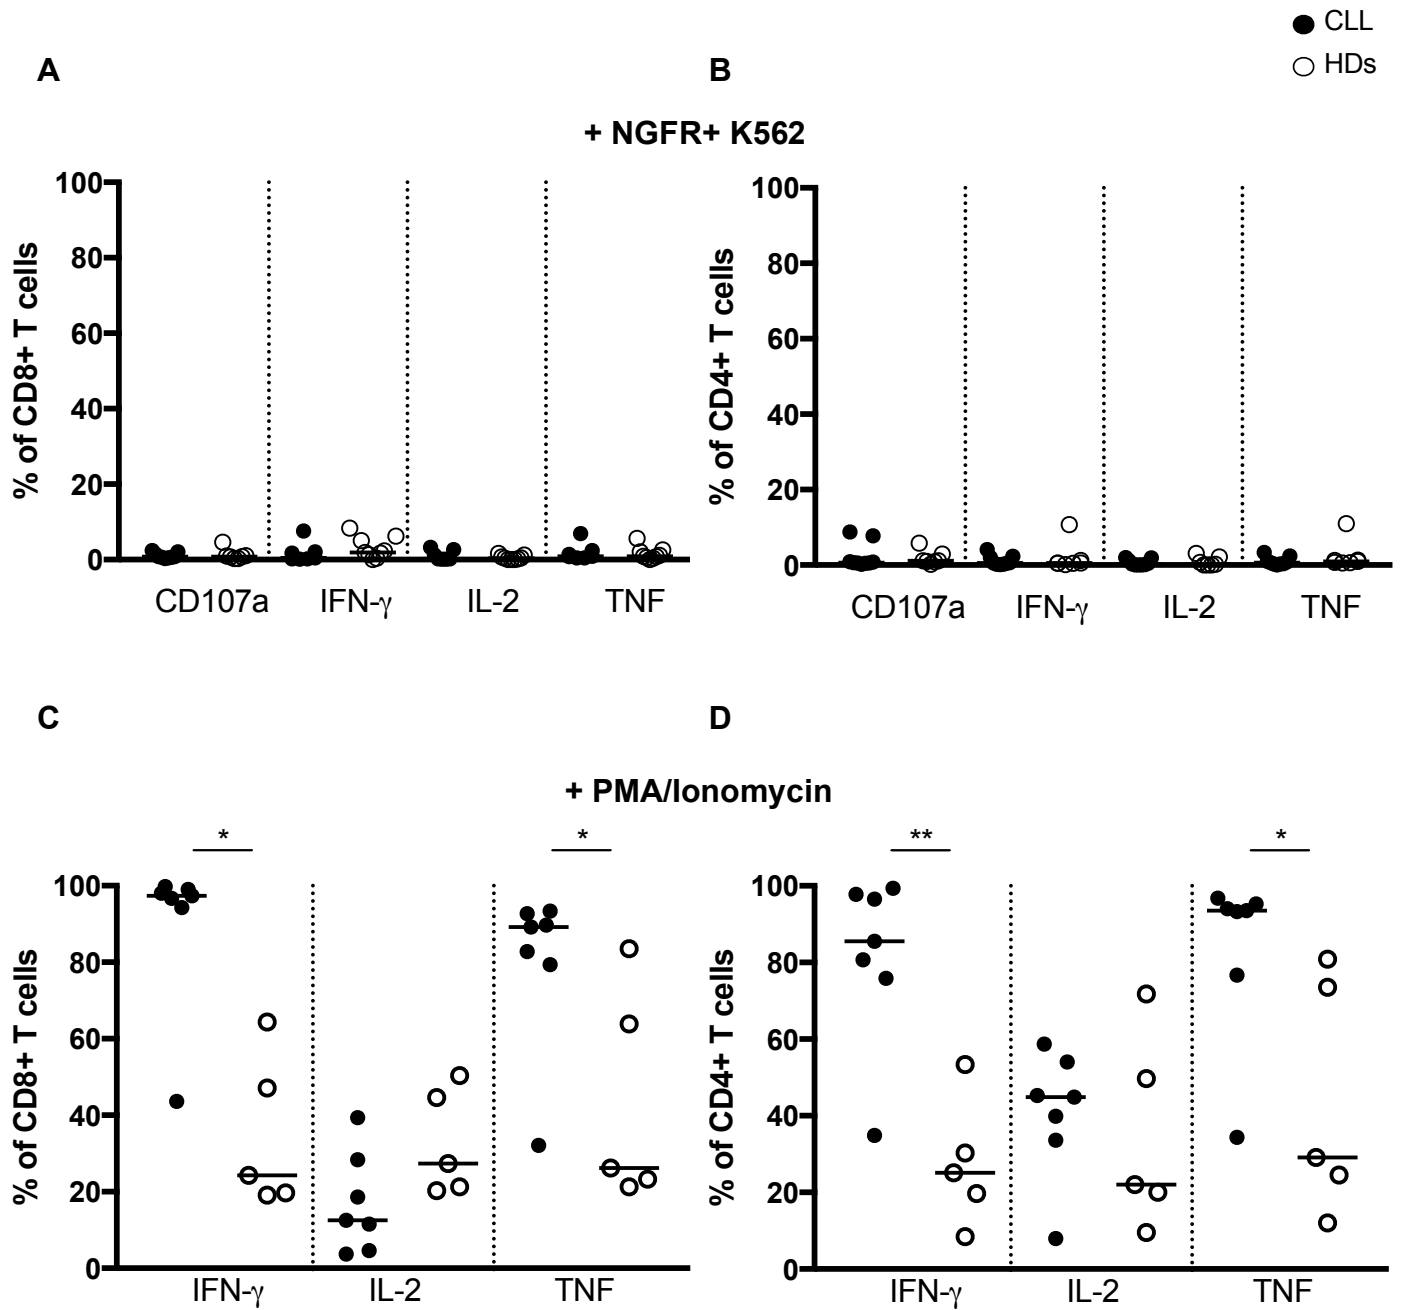

Supplementary Figure 6.

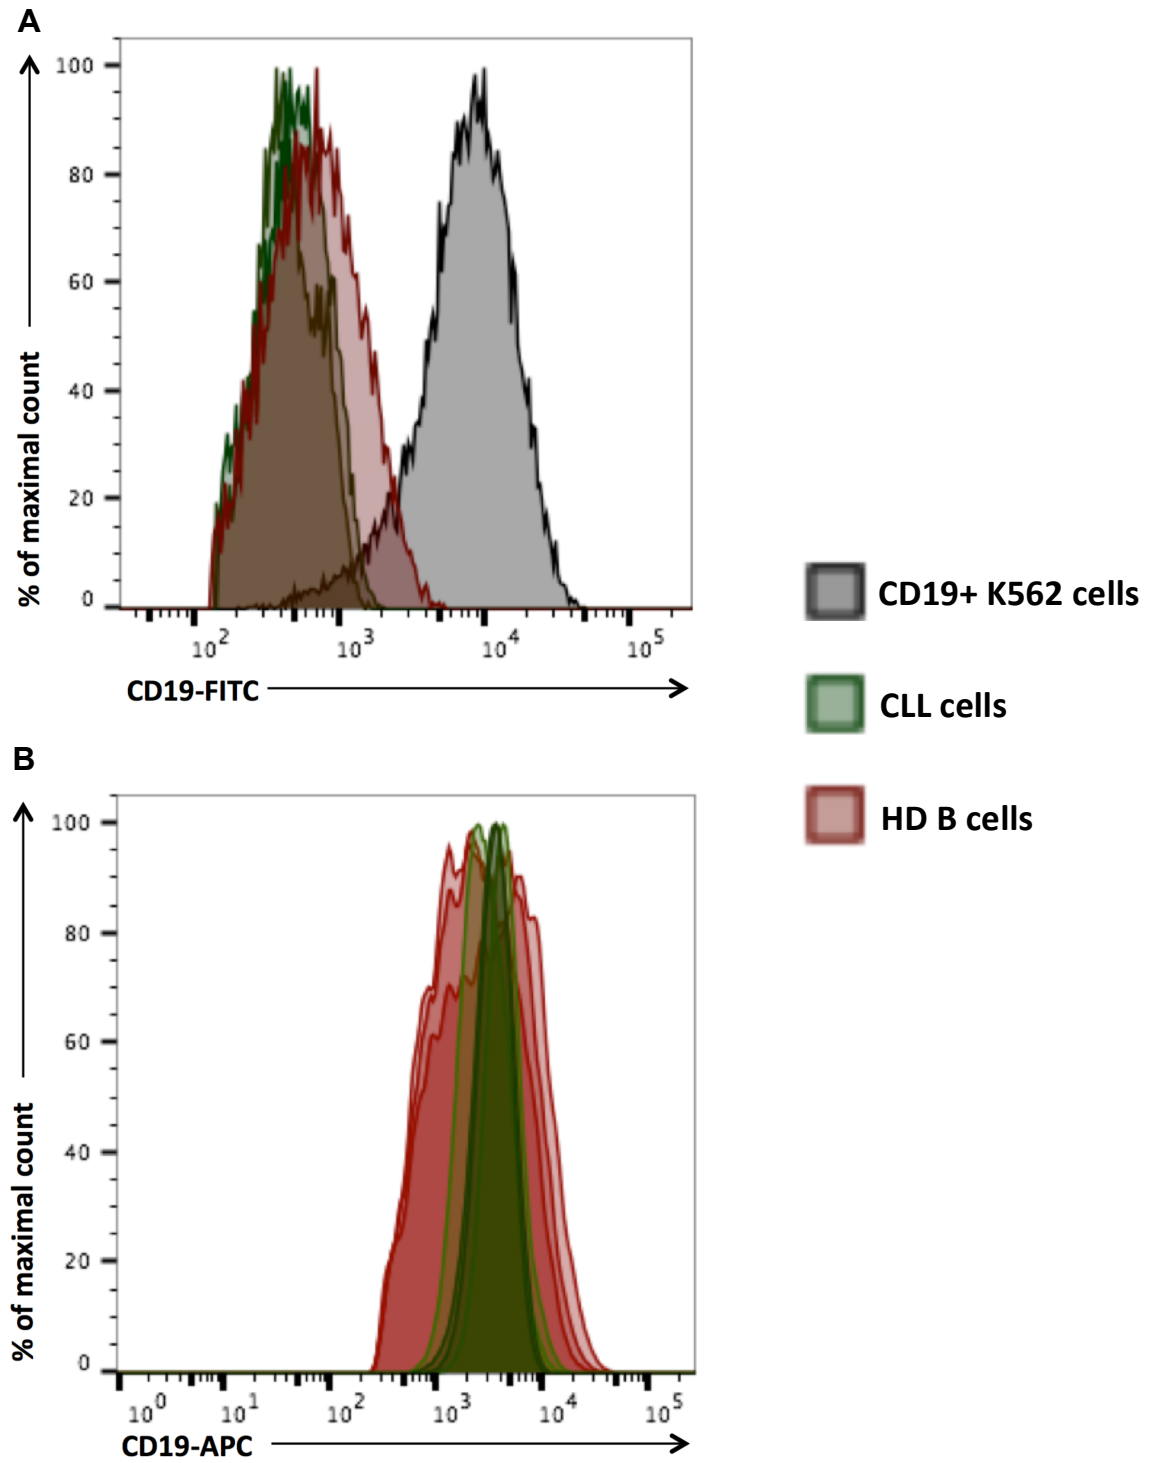





**Supplementary Table 1. Characteristics of patients with CLL**

| <b>Patient</b> | <b>WBC<br/>(10<sup>9</sup>/L)</b> | <b>Lymphocytes<br/>(10<sup>9</sup>/L)</b> | <b>Rai<br/>stage *</b> | <b>FISH</b> | <b>Clinical<br/>phase**</b> | <b>Previous<br/>therapy</b> | <b>Ongoing<br/>therapy</b> | <b>Response to<br/>last therapy</b> |
|----------------|-----------------------------------|-------------------------------------------|------------------------|-------------|-----------------------------|-----------------------------|----------------------------|-------------------------------------|
| #01            | 27.2                              | 23                                        | -                      | 13q-        | Stable PR<br>after therapy  | Yes, FC<br>(2010)           | No                         | PR                                  |
| #02            | 170                               | 167                                       | 3                      | ND          | Progressive<br>disease      | No                          | No                         | -                                   |
| #03            | 56                                | 51.2                                      | 4                      | 11q-        | Progressive<br>disease      | Yes, FC<br>(2008)           | No                         | PR                                  |
| #04            | 23                                | 19.3                                      | 1                      | ND          | Indolent                    |                             | No                         | -                                   |
| #05            | 287.6                             | 279.2                                     | 3                      | Normal      | Progressive<br>disease      | No                          | No                         | -                                   |
| #06            | 106.9                             | 105.9                                     | 3                      | ND          | Indolent                    | No                          | No                         | -                                   |
| #07            | 281.3                             | 280.5                                     | 4                      | 13q-        | Progressive<br>disease      | No                          | No                         | -                                   |
| #08            | 102.9                             | 97.8                                      | 3                      | 13q-        | Progressive<br>disease      | No                          | No                         | -                                   |
| #09            | 62.7                              | 60.5                                      | 0                      | ND          | Indolent                    | No                          | No                         | -                                   |
| #10            | 161.2                             | 160.7                                     | 4                      | 13q-        | Progressive<br>disease      | No                          | No                         | -                                   |
| #11            | 121.8                             | 118                                       | 1                      | 17q-        | Progressive<br>disease      | No                          | No                         | -                                   |
| #12            | 157.5                             | 154.2                                     | 2                      | 13q-        | Indolent                    | No                          | No                         | -                                   |

WBC= whole blood count, PR= partial response, FC= fludarabine cyclophosphamide, ND= not determined, (-)= not applicable. \* For untreated patients only. \*\* At time of blood collection.
